# Supplementary material for: The Intersection of the Genetic Architectures of Orofacial Clefts and Normal Facial Variation
Source: Frontiers journal article supplement (doi:10.3389/fgene.2021.626403), 2021-02-22
Supplement: Data_Sheet_1.zip [file Data_Sheet_1.zip]

## Figure S2: Overview of the NSCL/P endophenotypic traits

K. Indencleef et al.

### Contents

|                      |   |                      |   |                      |   |                      |    |
|----------------------|---|----------------------|---|----------------------|---|----------------------|----|
| Segment 1 . . . . .  | 2 | Segment 16 . . . . . | 4 | Segment 34 . . . . . | 7 | Segment 49 . . . . . | 9  |
| Segment 2 . . . . .  | 2 | Segment 17 . . . . . | 4 | Segment 35 . . . . . | 7 | Segment 50 . . . . . | 9  |
| Segment 3 . . . . .  | 2 | Segment 18 . . . . . | 4 | Segment 36 . . . . . | 7 | Segment 51 . . . . . | 9  |
| Segment 4 . . . . .  | 2 | Segment 19 . . . . . | 5 | Segment 37 . . . . . | 7 | Segment 52 . . . . . | 10 |
| Segment 5 . . . . .  | 2 | Segment 20 . . . . . | 5 | Segment 38 . . . . . | 7 | Segment 53 . . . . . | 10 |
| Segment 6 . . . . .  | 2 | Segment 22 . . . . . | 5 | Segment 39 . . . . . | 7 | Segment 54 . . . . . | 10 |
| Segment 7 . . . . .  | 3 | Segment 23 . . . . . | 5 | Segment 40 . . . . . | 8 | Segment 56 . . . . . | 10 |
| Segment 8 . . . . .  | 3 | Segment 24 . . . . . | 5 | Segment 41 . . . . . | 8 | Segment 57 . . . . . | 10 |
| Segment 9 . . . . .  | 3 | Segment 25 . . . . . | 5 | Segment 42 . . . . . | 8 | Segment 58 . . . . . | 10 |
| Segment 10 . . . . . | 3 | Segment 26 . . . . . | 6 | Segment 43 . . . . . | 8 | Segment 59 . . . . . | 11 |
| Segment 11 . . . . . | 3 | Segment 28 . . . . . | 6 | Segment 44 . . . . . | 8 | Segment 60 . . . . . | 11 |
| Segment 12 . . . . . | 3 | Segment 29 . . . . . | 6 | Segment 45 . . . . . | 8 | Segment 61 . . . . . | 11 |
| Segment 13 . . . . . | 4 | Segment 30 . . . . . | 6 | Segment 46 . . . . . | 9 | Segment 62 . . . . . | 11 |
| Segment 14 . . . . . | 4 | Segment 31 . . . . . | 6 | Segment 47 . . . . . | 9 | Segment 63 . . . . . | 11 |
| Segment 15 . . . . . | 4 | Segment 33 . . . . . | 6 | Segment 48 . . . . . | 9 |                      |    |

### Segment 1

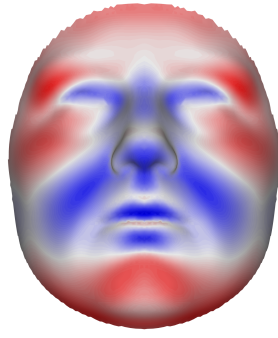

Endophenotypic trait in segment 1. The normal displacement (displacement in the direction locally normal to the facial surface) in each quasi-landmark going from the control to unaffected parent phenotype in segment 1. Blue, inward depression; red, outward protrusion.

### Segment 4

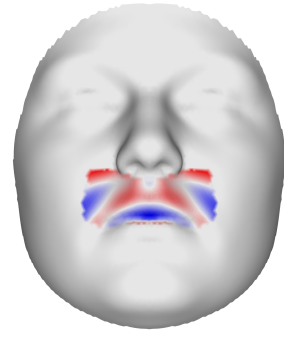

Endophenotypic trait in segment 4. The normal displacement (displacement in the direction locally normal to the facial surface) in each quasi-landmark going from the control to unaffected parent phenotype in segment 4. Blue, inward depression; red, outward protrusion.

### Segment 2

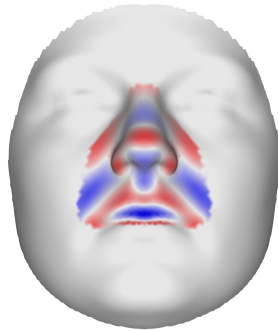

Endophenotypic trait in segment 2. The normal displacement (displacement in the direction locally normal to the facial surface) in each quasi-landmark going from the control to unaffected parent phenotype in segment 2. Blue, inward depression; red, outward protrusion.

### Segment 5

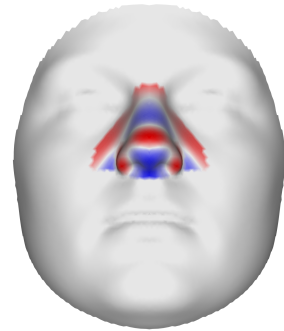

Endophenotypic trait in segment 5. The normal displacement (displacement in the direction locally normal to the facial surface) in each quasi-landmark going from the control to unaffected parent phenotype in segment 5. Blue, inward depression; red, outward protrusion.

### Segment 3

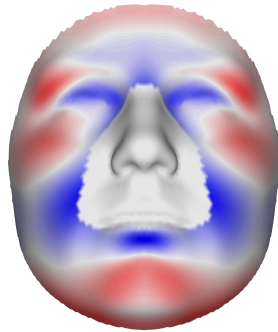

Endophenotypic trait in segment 3. The normal displacement (displacement in the direction locally normal to the facial surface) in each quasi-landmark going from the control to unaffected parent phenotype in segment 3. Blue, inward depression; red, outward protrusion.

### Segment 6

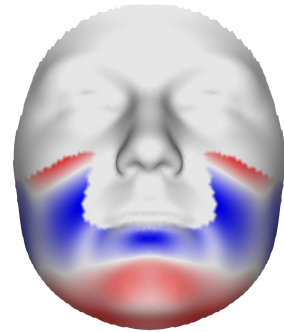

Endophenotypic trait in segment 6. The normal displacement (displacement in the direction locally normal to the facial surface) in each quasi-landmark going from the control to unaffected parent phenotype in segment 6. Blue, inward depression; red, outward protrusion.

### Segment 7

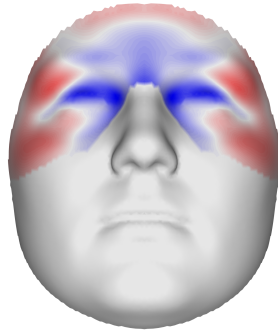

Endophenotypic trait in segment 7. The normal displacement (displacement in the direction locally normal to the facial surface) in each quasi-landmark going from the control to unaffected parent phenotype in segment 7. Blue, inward depression; red, outward protrusion.

### Segment 10

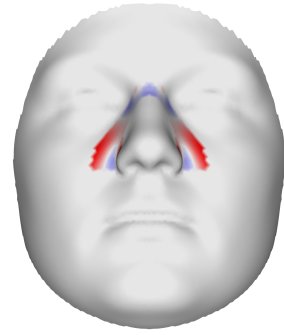

Endophenotypic trait in segment 10. The normal displacement (displacement in the direction locally normal to the facial surface) in each quasi-landmark going from the control to unaffected parent phenotype in segment 10. Blue, inward depression; red, outward protrusion.

### Segment 8

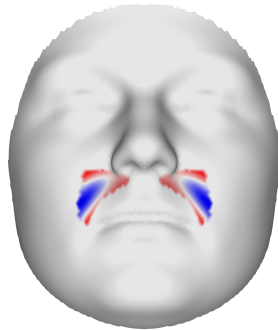

Endophenotypic trait in segment 8. The normal displacement (displacement in the direction locally normal to the facial surface) in each quasi-landmark going from the control to unaffected parent phenotype in segment 8. Blue, inward depression; red, outward protrusion.

### Segment 11

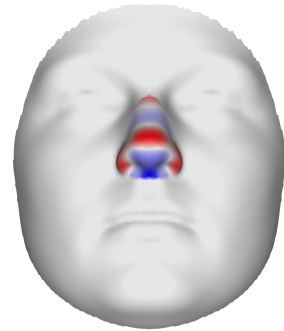

Endophenotypic trait in segment 11. The normal displacement (displacement in the direction locally normal to the facial surface) in each quasi-landmark going from the control to unaffected parent phenotype in segment 11. Blue, inward depression; red, outward protrusion.

### Segment 9

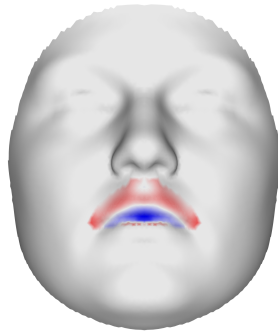

Endophenotypic trait in segment 9. The normal displacement (displacement in the direction locally normal to the facial surface) in each quasi-landmark going from the control to unaffected parent phenotype in segment 9. Blue, inward depression; red, outward protrusion.

### Segment 12

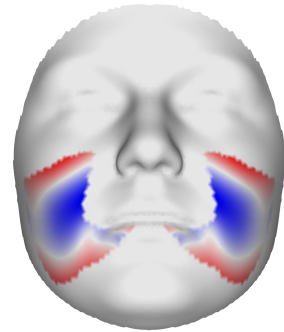

Endophenotypic trait in segment 12. The normal displacement (displacement in the direction locally normal to the facial surface) in each quasi-landmark going from the control to unaffected parent phenotype in segment 12. Blue, inward depression; red, outward protrusion.

### Segment 13

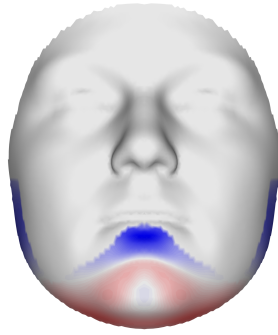

Endophenotypic trait in segment 13. The normal displacement (displacement in the direction locally normal to the facial surface) in each quasi-landmark going from the control to unaffected parent phenotype in segment 13. Blue, inward depression; red, outward protrusion.

### Segment 16

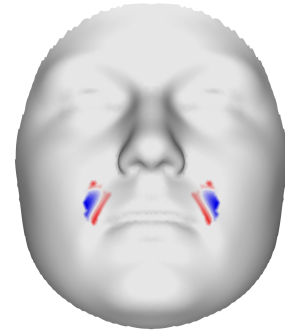

Endophenotypic trait in segment 16. The normal displacement (displacement in the direction locally normal to the facial surface) in each quasi-landmark going from the control to unaffected parent phenotype in segment 16. Blue, inward depression; red, outward protrusion.

### Segment 14

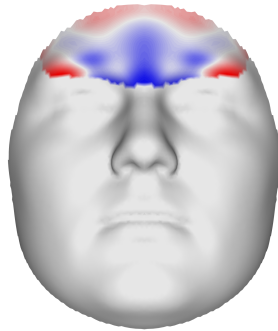

Endophenotypic trait in segment 14. The normal displacement (displacement in the direction locally normal to the facial surface) in each quasi-landmark going from the control to unaffected parent phenotype in segment 14. Blue, inward depression; red, outward protrusion.

### Segment 17

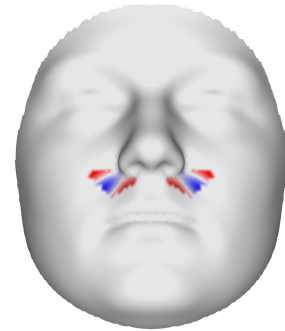

Endophenotypic trait in segment 17. The normal displacement (displacement in the direction locally normal to the facial surface) in each quasi-landmark going from the control to unaffected parent phenotype in segment 17. Blue, inward depression; red, outward protrusion.

### Segment 15

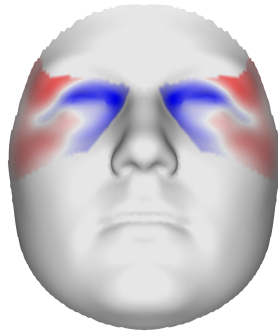

Endophenotypic trait in segment 15. The normal displacement (displacement in the direction locally normal to the facial surface) in each quasi-landmark going from the control to unaffected parent phenotype in segment 15. Blue, inward depression; red, outward protrusion.

### Segment 18

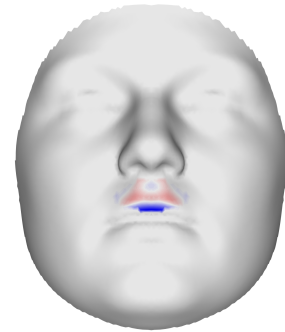

Endophenotypic trait in segment 18. The normal displacement (displacement in the direction locally normal to the facial surface) in each quasi-landmark going from the control to unaffected parent phenotype in segment 18. Blue, inward depression; red, outward protrusion.



## Segment 19

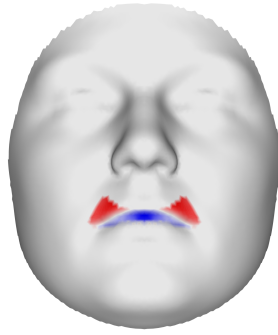

Endophenotypic trait in segment 19. The normal displacement (displacement in the direction locally normal to the facial surface) in each quasi-landmark going from the control to unaffected parent phenotype in segment 19. Blue, inward depression; red, outward protrusion.

## Segment 23

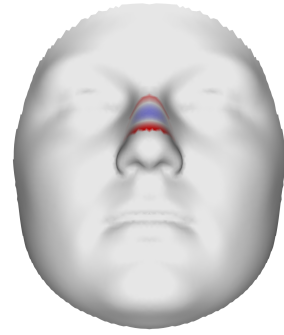

Endophenotypic trait in segment 23. The normal displacement (displacement in the direction locally normal to the facial surface) in each quasi-landmark going from the control to unaffected parent phenotype in segment 23. Blue, inward depression; red, outward protrusion.

## Segment 20

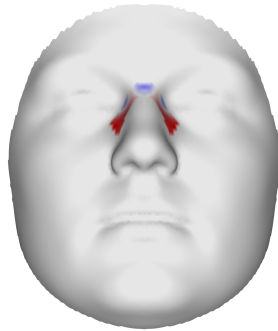

Endophenotypic trait in segment 20. The normal displacement (displacement in the direction locally normal to the facial surface) in each quasi-landmark going from the control to unaffected parent phenotype in segment 20. Blue, inward depression; red, outward protrusion.

## Segment 24

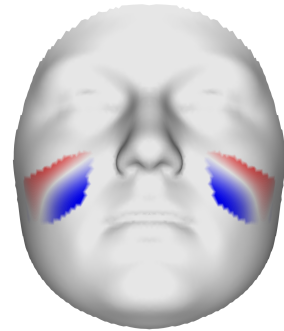

Endophenotypic trait in segment 24. The normal displacement (displacement in the direction locally normal to the facial surface) in each quasi-landmark going from the control to unaffected parent phenotype in segment 24. Blue, inward depression; red, outward protrusion.

## Segment 22

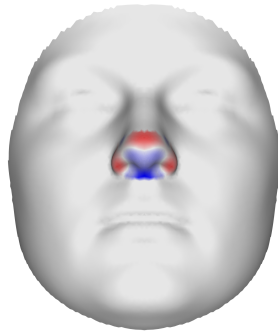

Endophenotypic trait in segment 22. The normal displacement (displacement in the direction locally normal to the facial surface) in each quasi-landmark going from the control to unaffected parent phenotype in segment 22. Blue, inward depression; red, outward protrusion.

## Segment 25

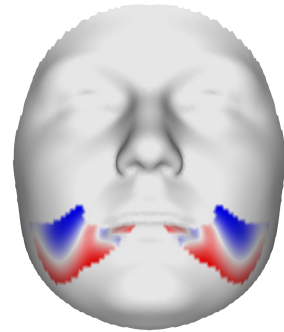

Endophenotypic trait in segment 25. The normal displacement (displacement in the direction locally normal to the facial surface) in each quasi-landmark going from the control to unaffected parent phenotype in segment 25. Blue, inward depression; red, outward protrusion.

### Segment 26

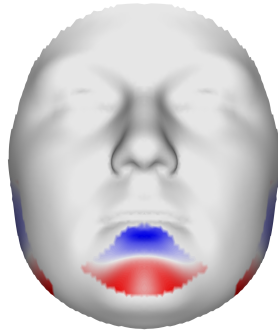

Endophenotypic trait in segment 26. The normal displacement (displacement in the direction locally normal to the facial surface) in each quasi-landmark going from the control to unaffected parent phenotype in segment 26. Blue, inward depression; red, outward protrusion.

### Segment 30

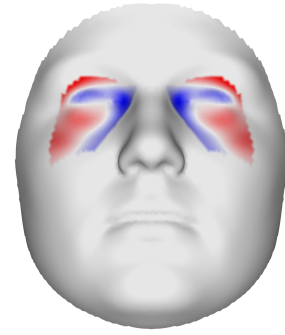

Endophenotypic trait in segment 30. The normal displacement (displacement in the direction locally normal to the facial surface) in each quasi-landmark going from the control to unaffected parent phenotype in segment 30. Blue, inward depression; red, outward protrusion.

### Segment 28

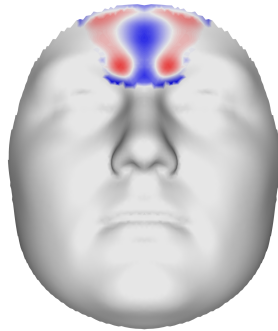

Endophenotypic trait in segment 28. The normal displacement (displacement in the direction locally normal to the facial surface) in each quasi-landmark going from the control to unaffected parent phenotype in segment 28. Blue, inward depression; red, outward protrusion.

### Segment 31

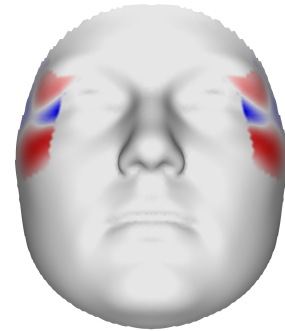

Endophenotypic trait in segment 31. The normal displacement (displacement in the direction locally normal to the facial surface) in each quasi-landmark going from the control to unaffected parent phenotype in segment 31. Blue, inward depression; red, outward protrusion.

### Segment 29

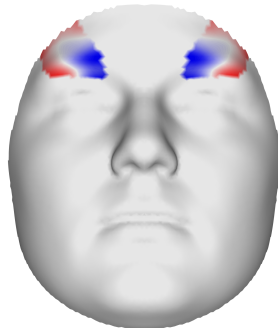

Endophenotypic trait in segment 29. The normal displacement (displacement in the direction locally normal to the facial surface) in each quasi-landmark going from the control to unaffected parent phenotype in segment 29. Blue, inward depression; red, outward protrusion.

### Segment 33

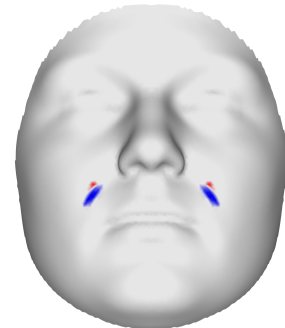

Endophenotypic trait in segment 33. The normal displacement (displacement in the direction locally normal to the facial surface) in each quasi-landmark going from the control to unaffected parent phenotype in segment 33. Blue, inward depression; red, outward protrusion.

### Segment 34

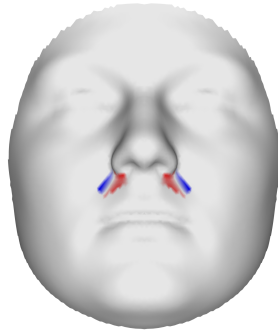

Endophenotypic trait in segment 34. The normal displacement (displacement in the direction locally normal to the facial surface) in each quasi-landmark going from the control to unaffected parent phenotype in segment 34. Blue, inward depression; red, outward protrusion.

### Segment 37

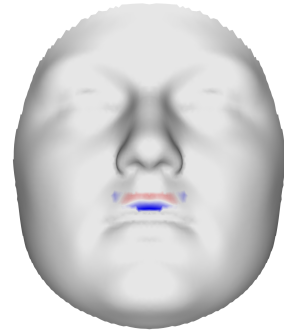

Endophenotypic trait in segment 37. The normal displacement (displacement in the direction locally normal to the facial surface) in each quasi-landmark going from the control to unaffected parent phenotype in segment 37. Blue, inward depression; red, outward protrusion.

### Segment 35

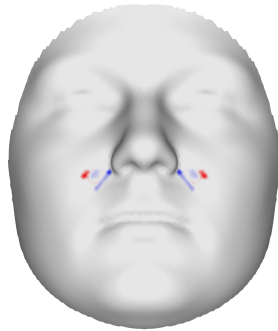

Endophenotypic trait in segment 35. The normal displacement (displacement in the direction locally normal to the facial surface) in each quasi-landmark going from the control to unaffected parent phenotype in segment 35. Blue, inward depression; red, outward protrusion.

### Segment 38

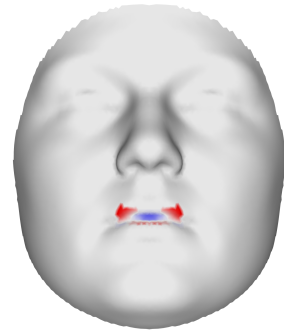

Endophenotypic trait in segment 38. The normal displacement (displacement in the direction locally normal to the facial surface) in each quasi-landmark going from the control to unaffected parent phenotype in segment 38. Blue, inward depression; red, outward protrusion.

### Segment 36

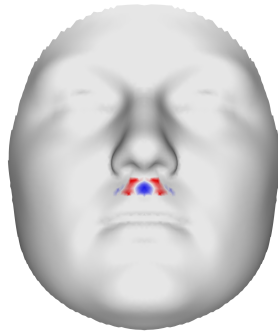

Endophenotypic trait in segment 36. The normal displacement (displacement in the direction locally normal to the facial surface) in each quasi-landmark going from the control to unaffected parent phenotype in segment 36. Blue, inward depression; red, outward protrusion.

### Segment 39

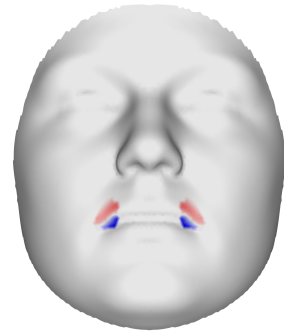

Endophenotypic trait in segment 39. The normal displacement (displacement in the direction locally normal to the facial surface) in each quasi-landmark going from the control to unaffected parent phenotype in segment 39. Blue, inward depression; red, outward protrusion.

### Segment 40

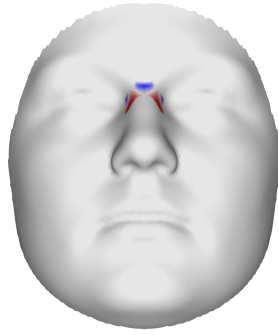

Endophenotypic trait in segment 40. The normal displacement (displacement in the direction locally normal to the facial surface) in each quasi-landmark going from the control to unaffected parent phenotype in segment 40. Blue, inward depression; red, outward protrusion.

### Segment 43

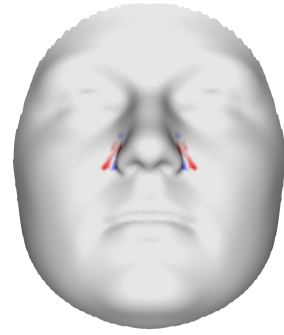

Endophenotypic trait in segment 43. The normal displacement (displacement in the direction locally normal to the facial surface) in each quasi-landmark going from the control to unaffected parent phenotype in segment 43. Blue, inward depression; red, outward protrusion.

### Segment 41

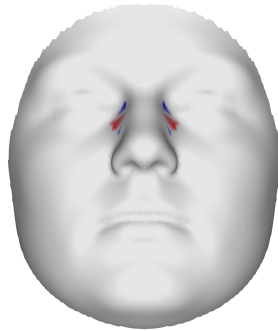

Endophenotypic trait in segment 41. The normal displacement (displacement in the direction locally normal to the facial surface) in each quasi-landmark going from the control to unaffected parent phenotype in segment 41. Blue, inward depression; red, outward protrusion.

### Segment 44

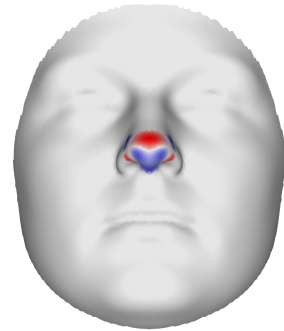

Endophenotypic trait in segment 44. The normal displacement (displacement in the direction locally normal to the facial surface) in each quasi-landmark going from the control to unaffected parent phenotype in segment 44. Blue, inward depression; red, outward protrusion.

### Segment 42

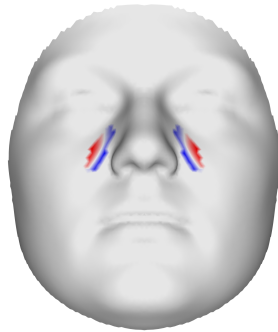

Endophenotypic trait in segment 42. The normal displacement (displacement in the direction locally normal to the facial surface) in each quasi-landmark going from the control to unaffected parent phenotype in segment 42. Blue, inward depression; red, outward protrusion.

### Segment 45

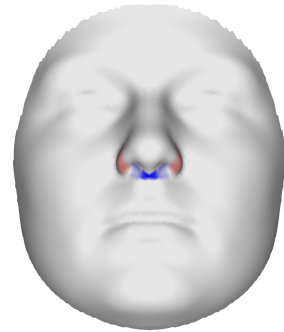

Endophenotypic trait in segment 45. The normal displacement (displacement in the direction locally normal to the facial surface) in each quasi-landmark going from the control to unaffected parent phenotype in segment 45. Blue, inward depression; red, outward protrusion.

### Segment 46

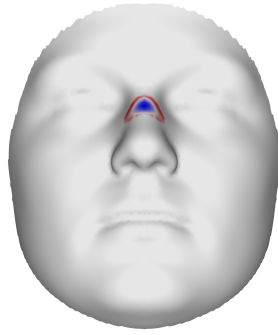

Endophenotypic trait in segment 46. The normal displacement (displacement in the direction locally normal to the facial surface) in each quasi-landmark going from the control to unaffected parent phenotype in segment 46. Blue, inward depression; red, outward protrusion.

### Segment 49

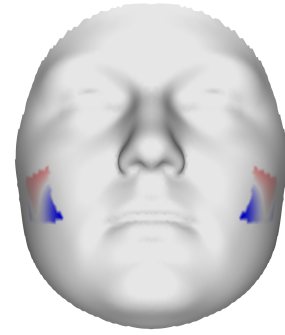

Endophenotypic trait in segment 49. The normal displacement (displacement in the direction locally normal to the facial surface) in each quasi-landmark going from the control to unaffected parent phenotype in segment 49. Blue, inward depression; red, outward protrusion.

### Segment 47

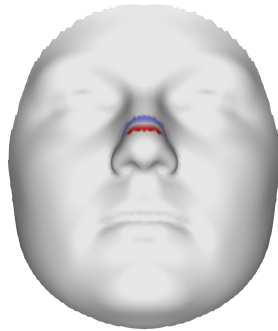

Endophenotypic trait in segment 47. The normal displacement (displacement in the direction locally normal to the facial surface) in each quasi-landmark going from the control to unaffected parent phenotype in segment 47. Blue, inward depression; red, outward protrusion.

### Segment 50

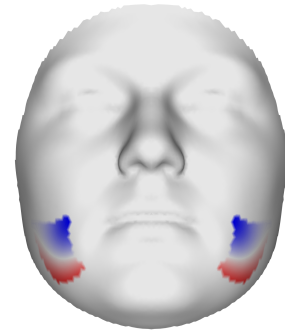

Endophenotypic trait in segment 50. The normal displacement (displacement in the direction locally normal to the facial surface) in each quasi-landmark going from the control to unaffected parent phenotype in segment 50. Blue, inward depression; red, outward protrusion.

### Segment 48

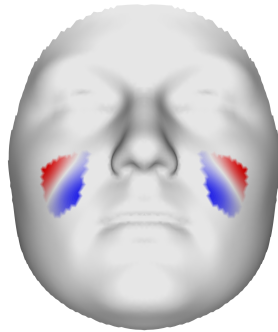

Endophenotypic trait in segment 48. The normal displacement (displacement in the direction locally normal to the facial surface) in each quasi-landmark going from the control to unaffected parent phenotype in segment 48. Blue, inward depression; red, outward protrusion.

### Segment 51

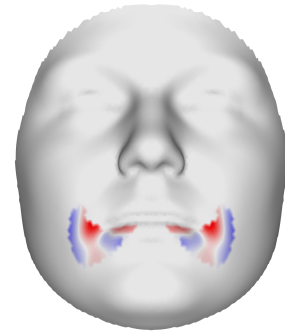

Endophenotypic trait in segment 51. The normal displacement (displacement in the direction locally normal to the facial surface) in each quasi-landmark going from the control to unaffected parent phenotype in segment 51. Blue, inward depression; red, outward protrusion.

### Segment 52

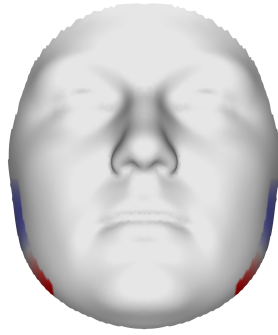

Endophenotypic trait in segment 52. The normal displacement (displacement in the direction locally normal to the facial surface) in each quasi-landmark going from the control to unaffected parent phenotype in segment 52. Blue, inward depression; red, outward protrusion.

### Segment 56

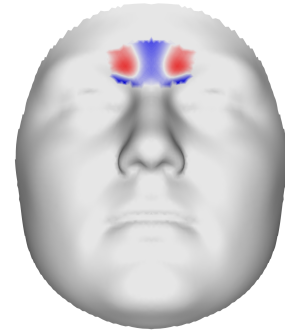

Endophenotypic trait in segment 56. The normal displacement (displacement in the direction locally normal to the facial surface) in each quasi-landmark going from the control to unaffected parent phenotype in segment 56. Blue, inward depression; red, outward protrusion.

### Segment 53

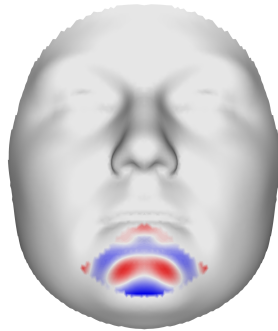

Endophenotypic trait in segment 53. The normal displacement (displacement in the direction locally normal to the facial surface) in each quasi-landmark going from the control to unaffected parent phenotype in segment 53. Blue, inward depression; red, outward protrusion.

### Segment 57

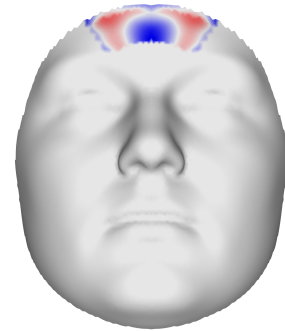

Endophenotypic trait in segment 57. The normal displacement (displacement in the direction locally normal to the facial surface) in each quasi-landmark going from the control to unaffected parent phenotype in segment 57. Blue, inward depression; red, outward protrusion.

### Segment 54

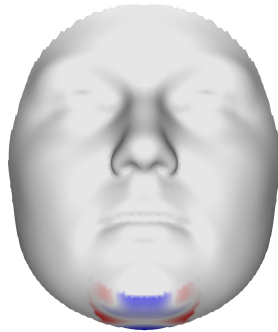

Endophenotypic trait in segment 54. The normal displacement (displacement in the direction locally normal to the facial surface) in each quasi-landmark going from the control to unaffected parent phenotype in segment 54. Blue, inward depression; red, outward protrusion.

### Segment 58

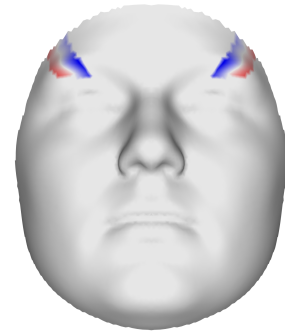

Endophenotypic trait in segment 58. The normal displacement (displacement in the direction locally normal to the facial surface) in each quasi-landmark going from the control to unaffected parent phenotype in segment 58. Blue, inward depression; red, outward protrusion.

## Segment 59

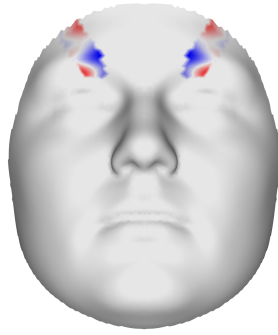

Endophenotypic trait in segment 59. The normal displacement (displacement in the direction locally normal to the facial surface) in each quasi-landmark going from the control to unaffected parent phenotype in segment 59. Blue, inward depression; red, outward protrusion.

## Segment 62

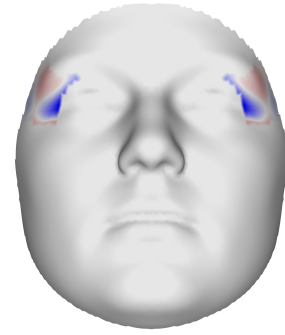

Endophenotypic trait in segment 62. The normal displacement (displacement in the direction locally normal to the facial surface) in each quasi-landmark going from the control to unaffected parent phenotype in segment 62. Blue, inward depression; red, outward protrusion.

## Segment 60

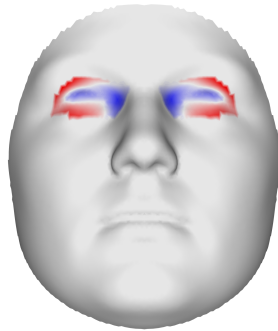

Endophenotypic trait in segment 60. The normal displacement (displacement in the direction locally normal to the facial surface) in each quasi-landmark going from the control to unaffected parent phenotype in segment 60. Blue, inward depression; red, outward protrusion.

## Segment 63

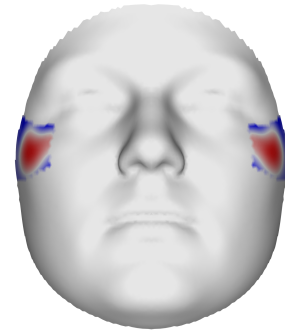

Endophenotypic trait in segment 63. The normal displacement (displacement in the direction locally normal to the facial surface) in each quasi-landmark going from the control to unaffected parent phenotype in segment 63. Blue, inward depression; red, outward protrusion.

## Segment 61

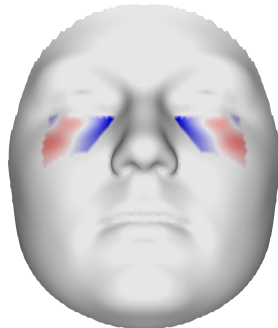

Endophenotypic trait in segment 61. The normal displacement (displacement in the direction locally normal to the facial surface) in each quasi-landmark going from the control to unaffected parent phenotype in segment 61. Blue, inward depression; red, outward protrusion.
